# Supplementary material
Source: PubMed Central journal article supplement (PMC4312752)
Supplement: NIHMS618639-supplement-supplement_1.pdf [file NIHMS618639-supplement-supplement_1.pdf]

## Supplementary Table

**Table S1:** Tryptic peptides of PDI-family members carrying CxxC redox-active motifs. Accession numbers correspond to UniprotKB (<http://www.uniprot.org/>) entries. Tryptic peptides were predicted from known UniprotKB sequences using ExPASy PeptideMass ([http://web.expasy.org/peptide\\_mass/](http://web.expasy.org/peptide_mass/)) tool. Out of 25 CxxC containing peptides from 13 PDI-family members, only two peptides exhibit identical masses (underlined).

| Gene Name/accession number | Selected Aliases                        | CxxC Redox Peptide                                                                                             | AA Coverage                              | Iodoacetate ( <sup>12</sup> C) Modified          |
|----------------------------|-----------------------------------------|----------------------------------------------------------------------------------------------------------------|------------------------------------------|--------------------------------------------------|
| DNAJC10/ Q8IXB1            | MTHr, ERdj5                             | EFDAAVNSGELWVNFYSPGCSHCHDLAPTWR<br>NHWVIDFYAPWCGPCQNFAPFELLAR<br>HNEVWMVDFYSPWCHPCQVLMPEWK<br>EPWLVDFFAPWCPPCR | 138-169<br>689-715<br>575-599<br>469-484 | 3771.6267<br>3339.5026<br>3277.4038<br>2078.9138 |
| ERP44/ Q9BS26              | KIAA0573, PDIA10                        | EITSLDTENIDEILNADVA LVNFYADWCR                                                                                 | 30-59                                    | 3514.6318                                        |
| P4HB/ P07237               | PDI, PROHB, PO4HB, P4Hb                 | YLLVEFYAPWCGHCK<br>NVFVEFYAPWCGHCK                                                                             | 43-57<br>387-401                         | 1944.8658<br>1915.8141                           |
| PDIA2/ Q13087              | PDA2, PDip                              | EHPALLVEFYAPWCGHCQALAPEYSK<br>FYAPWCTHCK                                                                       | 58-83<br>413-422                         | 3075.4015<br>1371.5496                           |
| PDIA3/ P30101              | P58, ERp61, ERp57, ERp60,               | ISDTGSAGLMLVEFFAPWCGHCK<br>DVLIEFYAPWCGHCK                                                                     | 39-61<br>396-410                         | 2585.1509<br><u>1896.8295</u>                    |
| PDIA4/ P13667              | ERP70, ERp72                            | ENFDEVVNDADIILVEFYAP WCGHCK<br>DTVLLEFYAPWCGHCK<br>DVLIEFYAPWCGHCK                                             | 185-210<br>80-95<br>545-559              | 3142.3808<br>1997.8771<br><u>1896.8295</u>       |
| PDIA5/ Q14554              | PDIr, FLJ30401                          | EKPLLIMFYAPWCSMCK<br>EHSSVLMFHAPWCGHCK<br>HTLVMFYAPWCPHCK                                                      | 169-186<br>292-309<br>416-430            | 2305.0411<br>2183.9459<br>1948.8542              |
| PDIA6/ Q15084              | P5, ERp5                                | EVIQSDSLWLVEFYAPWCGHCQR<br>NVLDSQVWVVEFYAPWCGHCK                                                               | 38-60<br>173-194                         | 2882.2912<br>2744.1465                           |
| TMX1/ Q9H3N1               | TMX, PDIA11                             | ELLEGDWMIEFYAPWCPACQNLQPEWESFAEWG-<br>EDLEVNIK                                                                 | 41-82                                    | 5102.2520                                        |
| TMX3/ Q96JJ7               | FLJ20793, PDIA13                        | NDDIWLVDYAPWCGHCK                                                                                              | 40-57                                    | 2297.9630                                        |
| TMX4/Q9H1E5                | DJ971N18.2, PDIA14                      | FYAPWCPCQQTSEWEAFK                                                                                             | 59-79                                    | 2610.0587                                        |
| TXNDC5/ Q86UY0             | FLJ90810, EndoPDI, Hcc-2, ERp46, PDIA15 | FYAPWCGHCK<br>FFAPWCGHCK<br>CGHCQR                                                                             | 273-282<br>140-149<br>17-22              | 1327.5234<br>1311.5285<br>819.2872               |
| TXNDC12/ O95881            | ERp18, ERP19, AGR1, PDIA16              | SWCGACK                                                                                                        | 64-70                                    | 870.3120                                         |
